# Supplementary material for: Vms1p is a release factor for the ribosome-associated quality control complex
Source: PubMed Central journal article supplement (PMC5989216; doi:10.1038/s41467-018-04564-3), 2018-06-06
Supplement: 41467_2018_4564_MOESM1_ESM.pdf [file 41467_2018_4564_MOESM1_ESM.pdf]

## **Supplementary Information**

**Vms1p is a release factor for the Ribosome-associated Quality control Complex**

**Zurita-Rendon et al.**

# Supplementary Figure 1

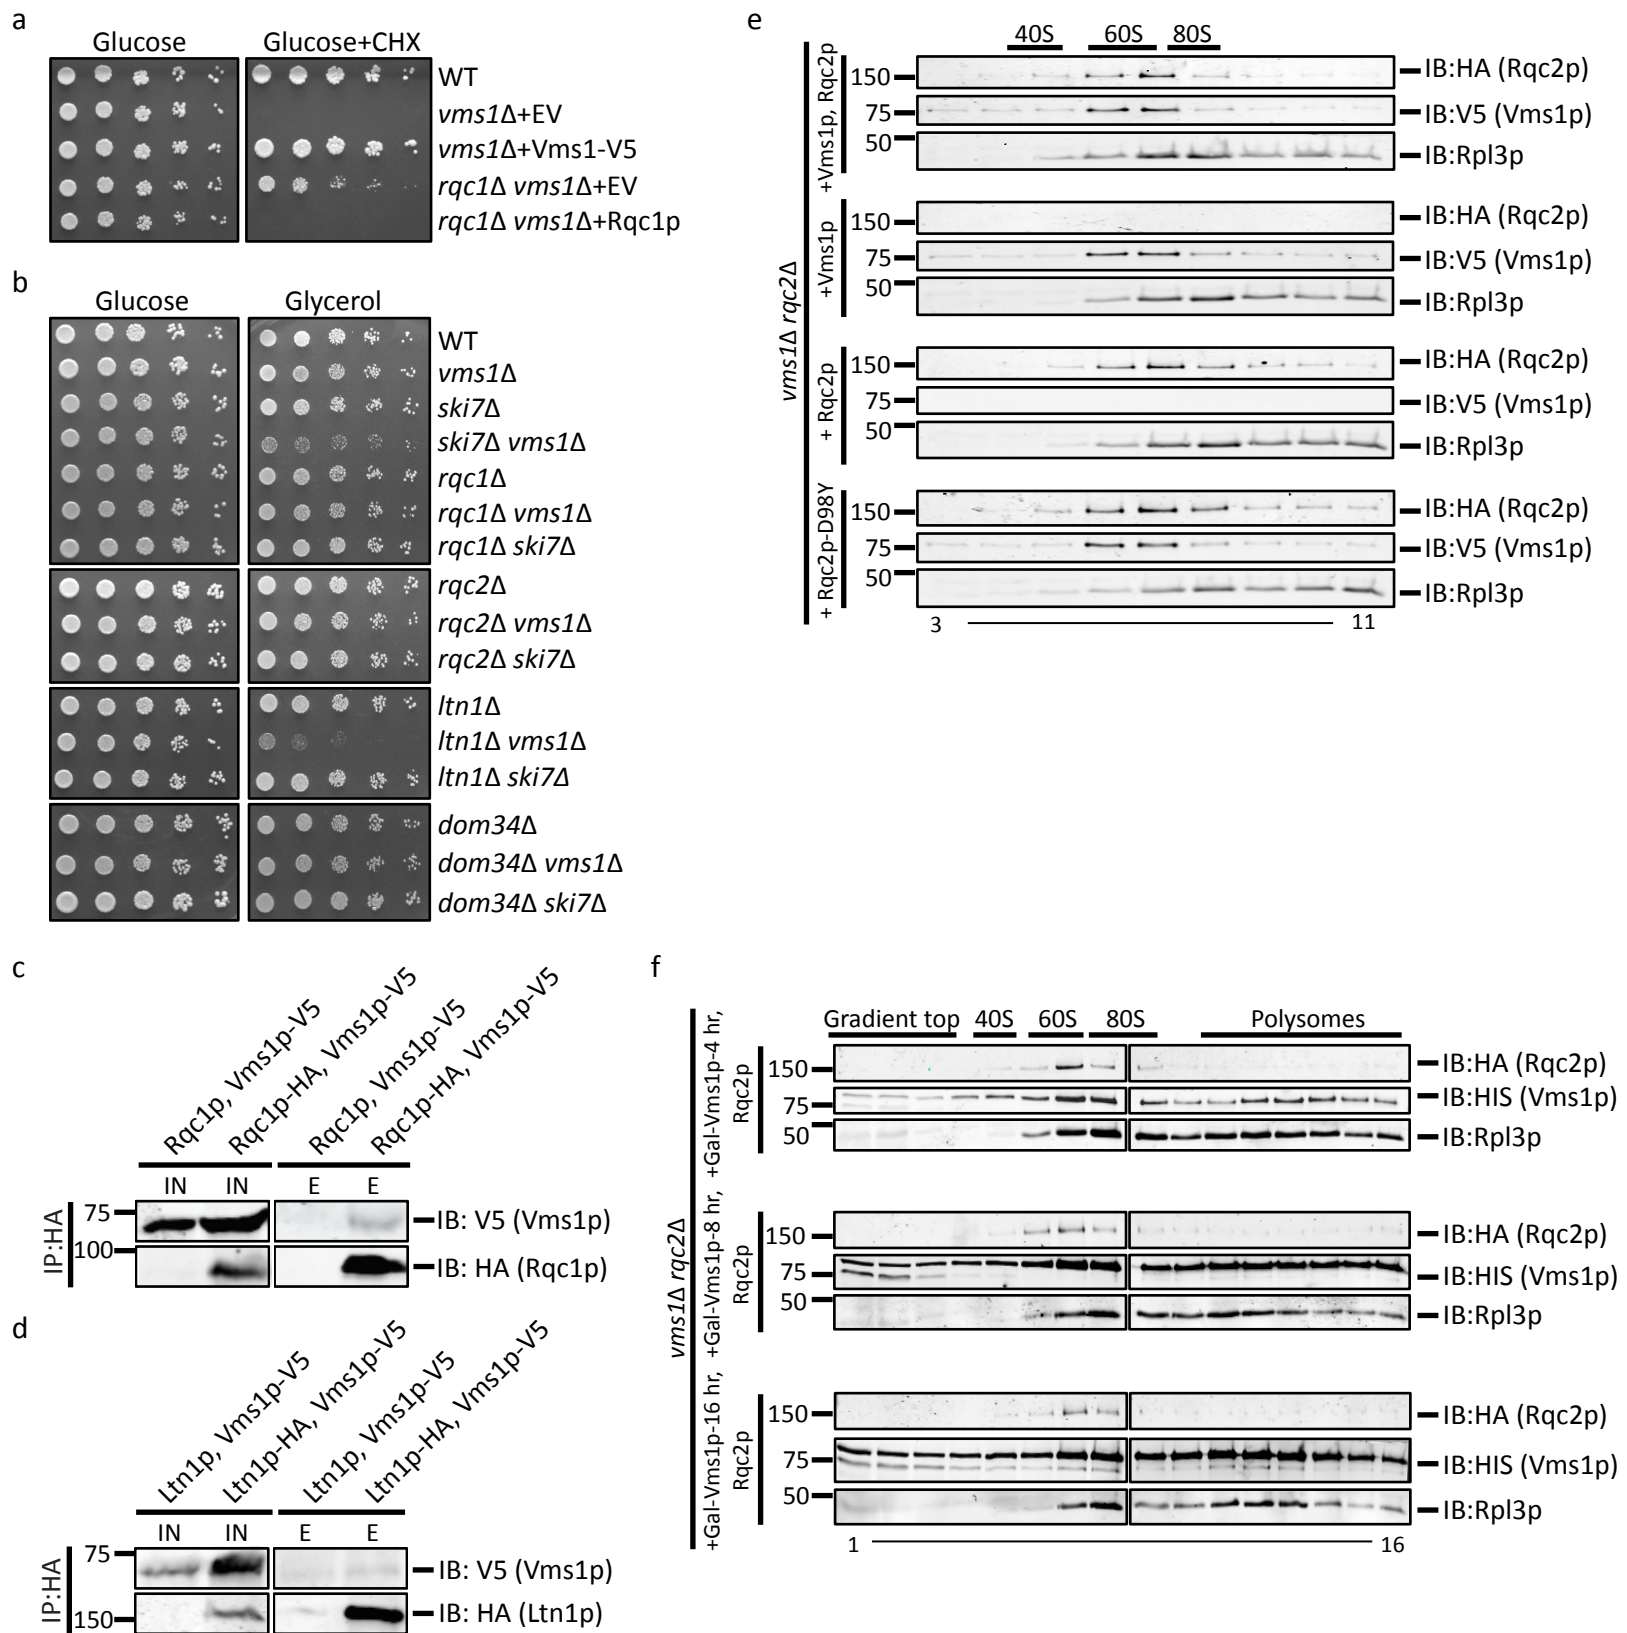

## Supplementary Figure 1.

- (a) Serial dilutions of indicated strains were spotted on media containing glucose or glucose supplemented with cycloheximide (CHX) and grown for 2 or 3 days, respectively.
- (b) Serial dilutions of the indicated strains were spotted on medium containing glucose or glycerol and grown for 2 or 3 days, respectively.
- (c) Immunoprecipitations using anti-HA antibody in the *rqc1Δ vms1Δ* strain expressing Rqc1p and Vms1p-V5 (control) or Rqc1p-HA and Vms1p-V5. Immunoblotting of HA and V5 were used to identify Rqc1p and Vms1p, respectively.
- (d) Immunoprecipitations using anti-HA antibody in the *ltn1Δ vms1Δ* strain expressing Ltn1p and Vms1p-V5 (control) or Ltn1p-HA and Vms1p-V5. Immunoblotting of HA and V5 were used to identify Ltn1p and Vms1p, respectively.
- (e) Polysome profiles of whole cell extracts from the *vms1Δ rqc2Δ* strain expressing Rqc2p-HA and Vms1p-V5, Vms1p-V5, Rqc2p-HA or the Rqc2p CAT-tailing-defective mutant Rqc2p-D98Y from top to bottom, respectively. Strains were treated with CHX prior to fractionation by sucrose density centrifugation. Chromatographic analysis ( $A_{254}$ ) was used to determine the distribution of the 40S, 60S, 80S and polysome content of the 16 collected fractions. Immunoblot analysis was performed only on fractions 3-11. The distribution of the 60S subunit was confirmed by immunoblotting of the ribosomal subunit, Rpl3p. Immunoblotting of HA and V5 was used to detect Rqc2p and Vms1p, respectively.
- (f) Polysome profiles of whole cell extracts from the *vms1Δ rqc2Δ* strain expressing Rqc2p-HA and Vms1p-V5 under the *GAL*-inducible promoter after galactose induction for 4, 8 and 16 hr from top to bottom, respectively. Chromatographic analysis ( $A_{254}$ ) was used to determine the distribution of the 40S, 60S, 80S and polysome content of the 16 collected fractions. The distribution of the 60S subunit was confirmed by immunoblotting of the ribosomal subunit, Rpl3p. Immunoblotting of HA and V5 was used to detect Rqc2p and Vms1p, respectively.

# Supplementary Figure 2

a

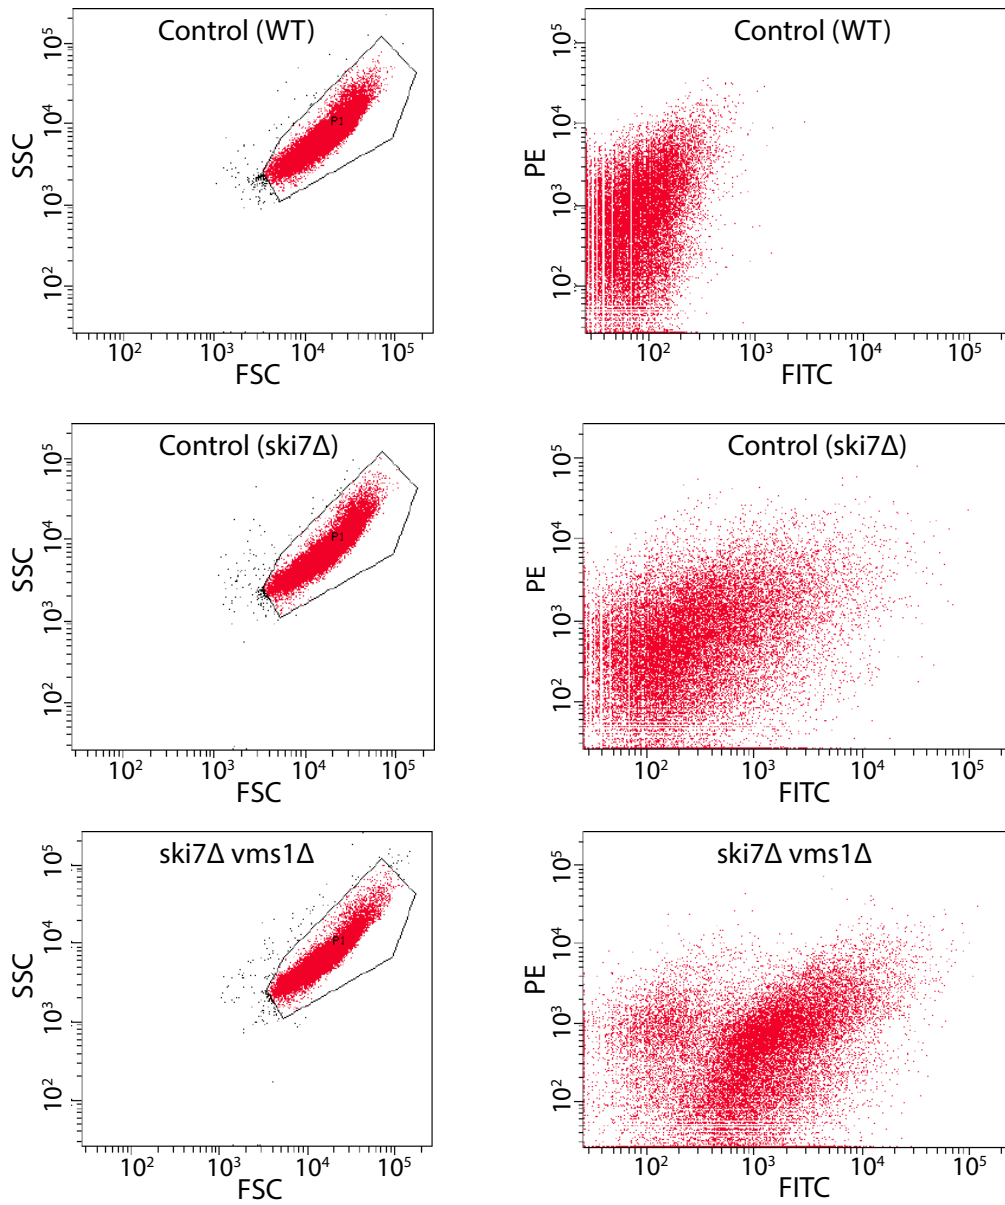

b

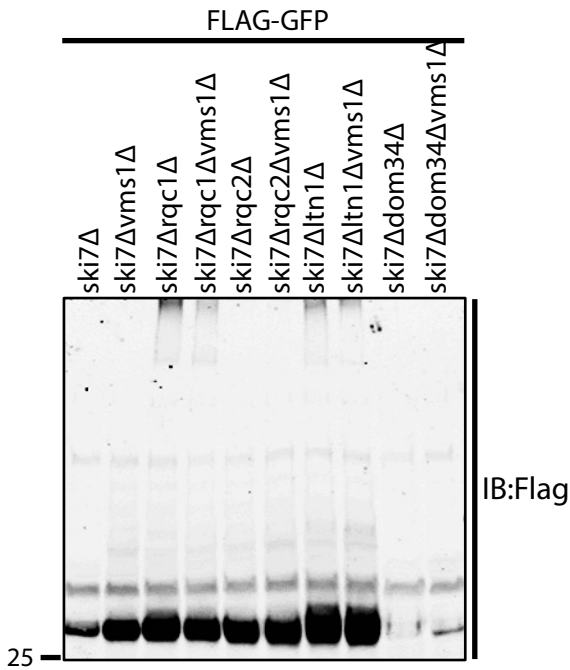

c

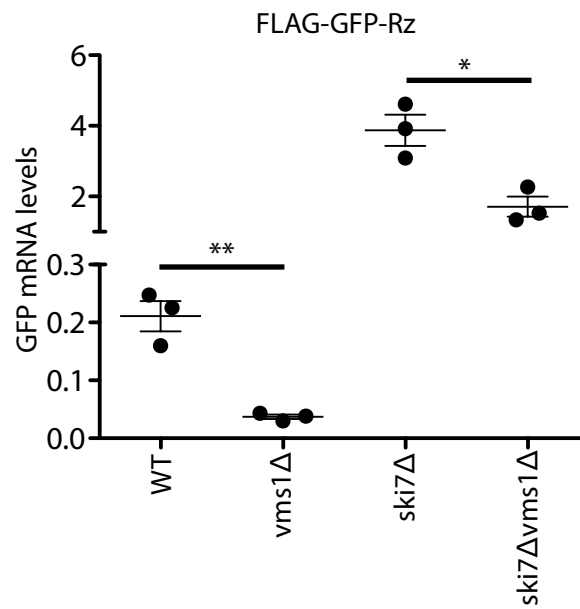

## Supplementary Figure 2.

(a) Gating strategy for analyzing FLAG-GFP positive cells. Panel shows gating parameters for collection of total GFP intensity, excluding cellular debris in WT, *ski7* $\Delta$  and *ski7* $\Delta$ *vms1* $\Delta$ . SSC, Side Scatter light; FSC, Forward Scatter light; PE, phycoerythrin; FITC, Fluorescein isothiocyanate. PE was plotted but not analyzed in this study.

(b) Immunoblot analysis of whole cell extracts from the indicated strains expressing the FLAG-GFP<sup>Rz</sup> construct (same as in Fig. 2). Immunoblotting of Flag (overexposed) was used to detect the accumulation of aggregates in the stacking portion of the gel.

(c) qRT-PCR analysis of the indicated strains expressing the FLAG-GFP<sup>Rz</sup> construct ( $n=3$ , data are mean  $\pm$  s.e.m.  $**P < 0.002$  and  $*P < 0.01$ ,  $P$ -value was calculated using unpaired Student's t-test).

# Supplementary Figure 3

**a**

| Description                               | Chain   | Z score | RMSD | Iali | %ID |
|-------------------------------------------|---------|---------|------|------|-----|
| Elongation factor I-alpha                 | 3vmf-B  | 6.9     | 3.4  | 111  | 6   |
| Eukaryotic peptide chain release factor 1 | 3e1y -C | 6.8     | 4.1  | 109  | 4   |
| Eukaryotic peptide chain release factor   | 1dt9-A  | 6.6     | 3.1  | 105  | 4   |
| Peptide chain release factor 1            | 4af1 -A | 6.5     | 4.0  | 116  | 8   |
| Dom34                                     | 2vgn -A | 6.5     | 5.0  | 115  | 7   |
| Pelota                                    | 3obw -A | 6.4     | 3.9  | 103  | 13  |
| Dom34                                     | 3izq -0 | 6.0     | 4.0  | 122  | 6   |
| Elongation factor 1-alpha                 | 3agj -B | 6.0     | 4.1  | 121  | 7   |
| Pelota                                    | 3oby -A | 5.9     | 4.3  | 120  | 4   |
| Ribonuclease E                            | 2c0b -L | 5.9     | 3.1  | 92   | 11  |

**b**

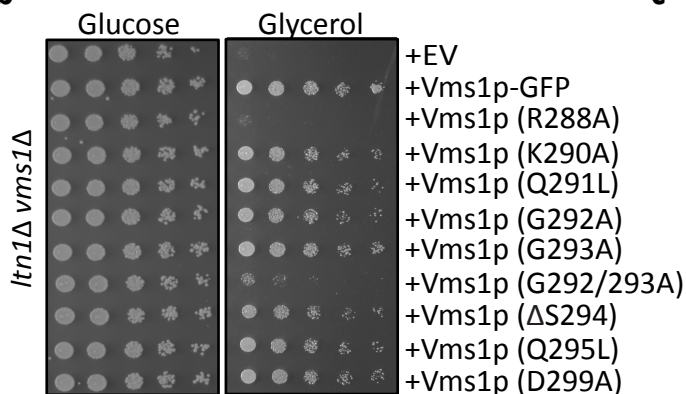

**c**

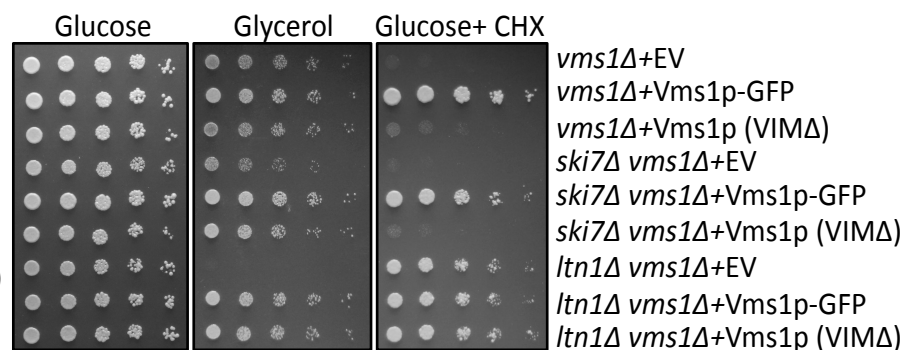

**d**

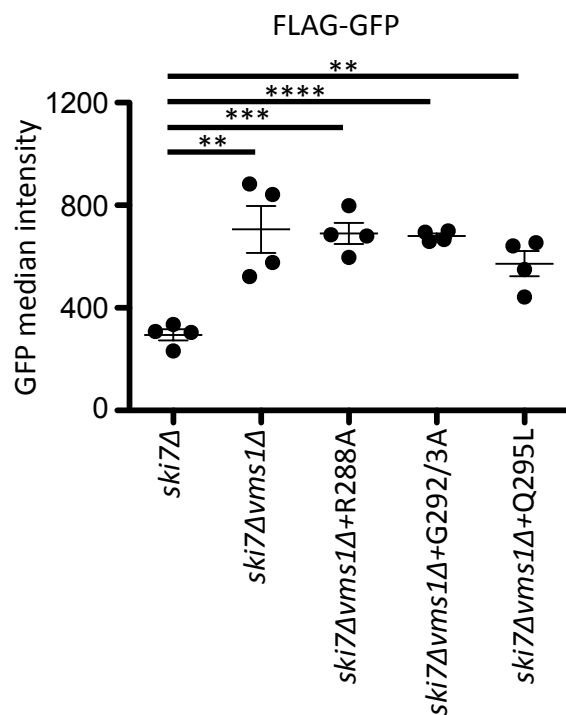

**e**

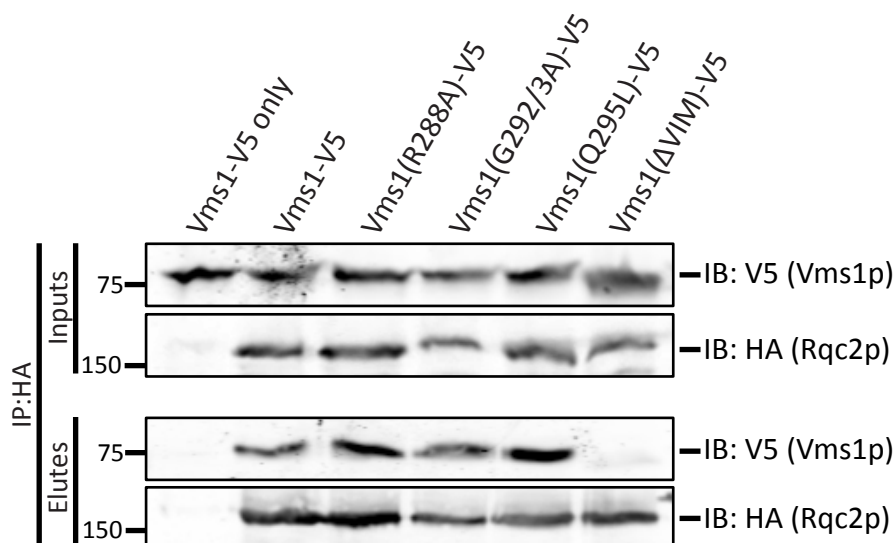

### Supplementary Figure 3.

(a) Similar structures to the Vms1p MTD/eRFL returned from the Dali server<sup>1</sup>. Z-score indicates degree of structural similarity, with above 2 being a similar fold. lali, number of aligned residues; %ID, percent identical residues.

(b) Serial dilutions of *ltn1Δ vms1Δ* cells with the indicated plasmids were spotted on synthetic media supplemented with glucose or glycerol.

(c) Serial dilutions of indicated strains were spotted on glucose, glycerol and glucose supplemented with cycloheximide (CHX) and grown for 2 or 3 days, respectively.

(d) Flow cytometry quantifications of FLAG-GFP accumulation in the indicated strains. Median GFP intensity values ( $n=4$ , data are mean  $\pm$  s.e.m. \*\* $P < 0.004$ , \*\*\* $P < 0.0002$ , \*\*\*\* $P < 0.0001$ ,  $P$ -value was calculated using unpaired Student's t-test).

(e) Immunoprecipitation using the anti-HA antibody in the *rqc2Δ vms1Δ* strain expressing Rqc2p and Vms1p-V5 (control); Rqc2p-HA and Vms1p-V5; or Rqc2p-HA and Vms1p-V5 mutants. Immunoblotting of HA and V5 was used to identify Rqc2p and Vms1p, respectively.

# Supplementary Figure 4

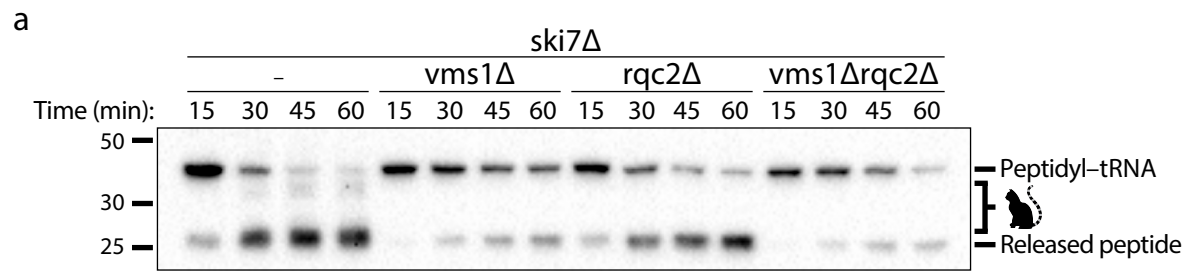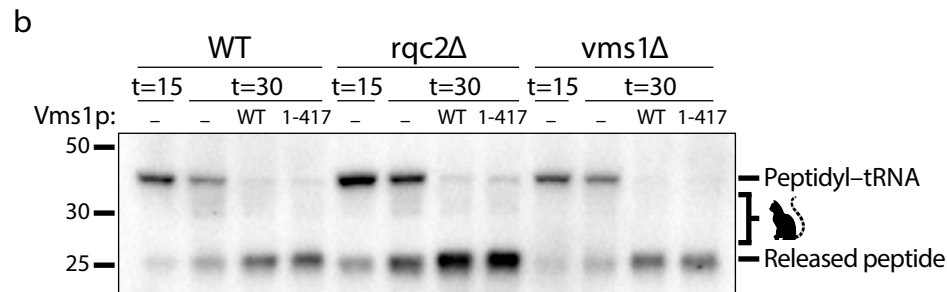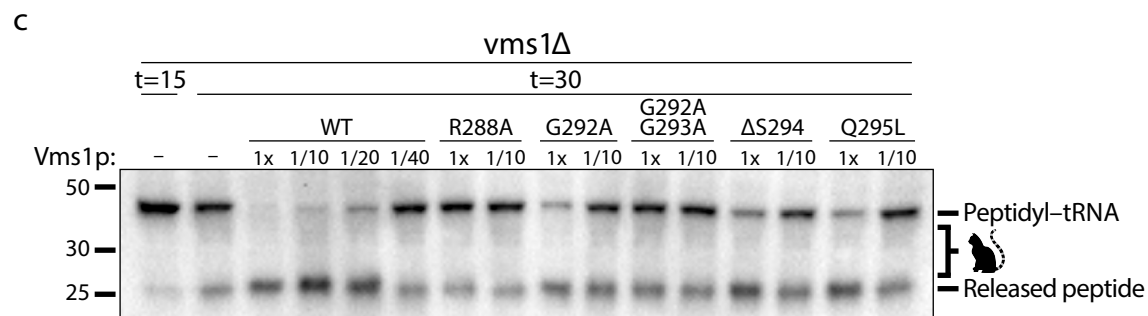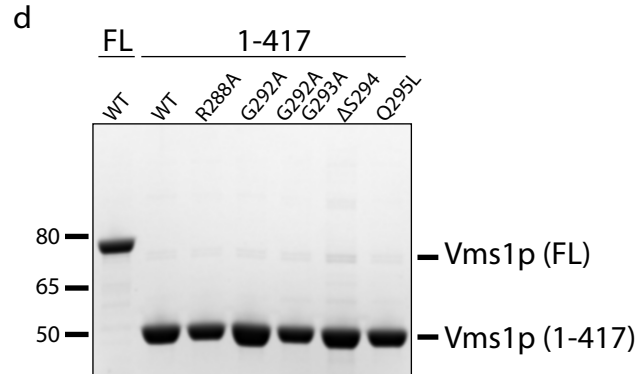



#### Supplementary Figure 4.

(a) Time courses of *S. cerevisiae* in vitro translation (SciVT) reactions prepared with a truncated mRNA (lacking a stop codon). Extract genotypes are indicated above. Peptides that have been CAT-tailed and released are denoted by a cat icon.

(b) SciVT reactions prepared as in (a) with WT, *rqc2* $\Delta$ , or *vms1* $\Delta$  extracts. At  $t=15$ , buffer ( - ) or pure protein (4.2  $\mu$ M final) was added. FL = Full Length Vms1; 1-417 = N-terminus through eRF1-like domain.

(c) SciVT reactions prepared as in (a) with a *vms1* $\Delta$  extract. At  $t=15$ , buffer, WT(1-417), or mutant(1-417) protein was added (see Methods).

(d) Coomassie staining of purified Vms1 proteins used in SciVT rescue experiments. FL = Full Length; 1-417 = N-terminus through eRF1-like domain.

# Supplementary Figure 5

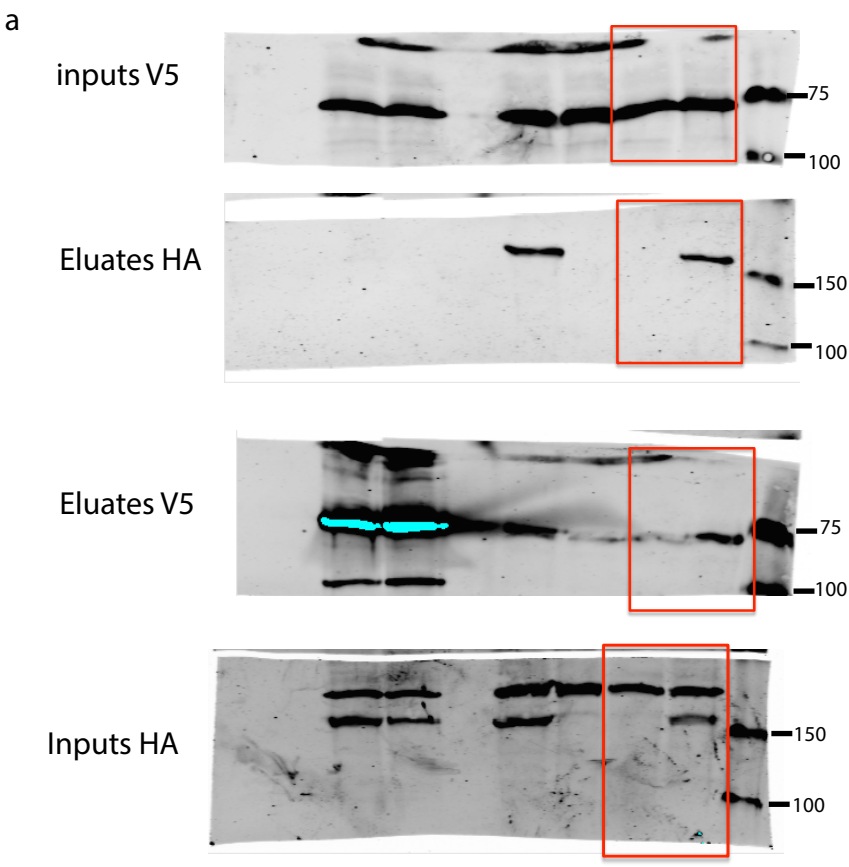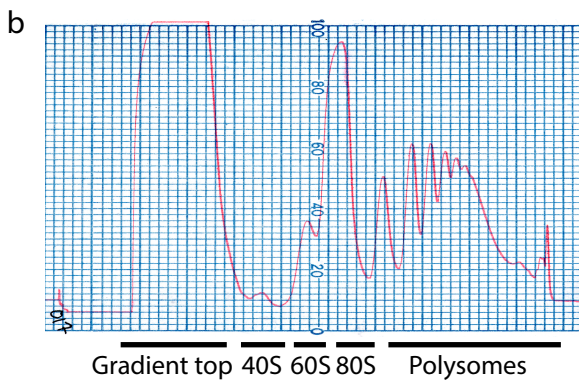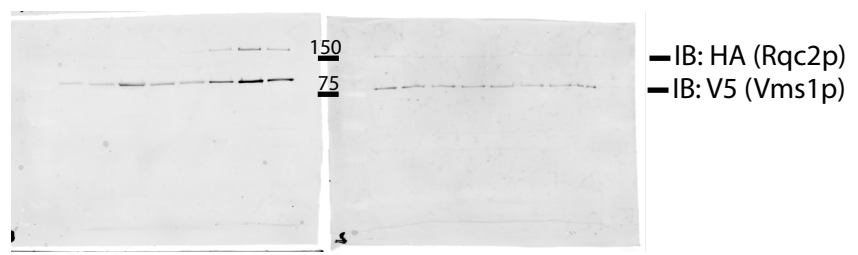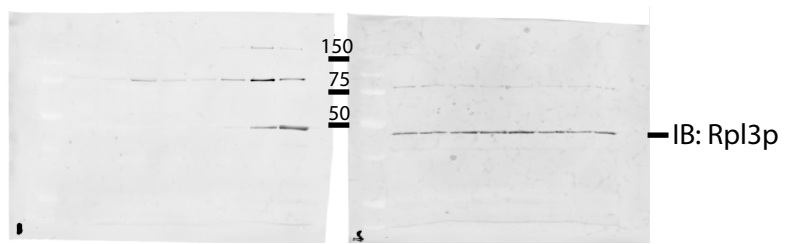

**Supplementary Figure 5.**

(a) Uncropped blots from figure 1c. Red boxes indicate the lanes used in the figure.

(b) Raw polysome trace and uncropped blots from figure 1d.

# Supplementary Figure 6

a

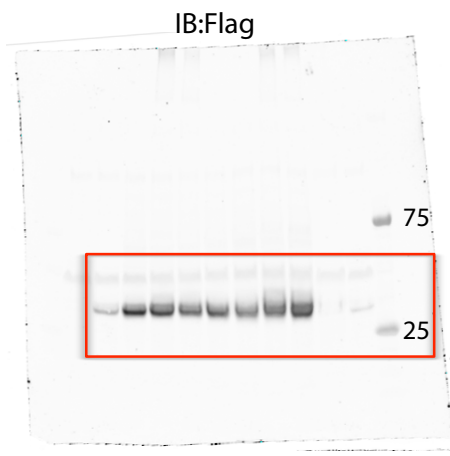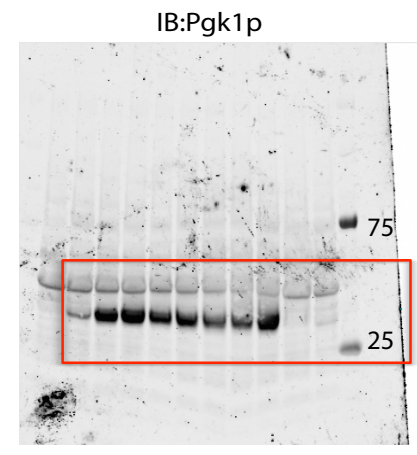

**Supplementary Figure 6.**

(a) Uncropped blots from figure 2c.

# Supplementary Figure 7

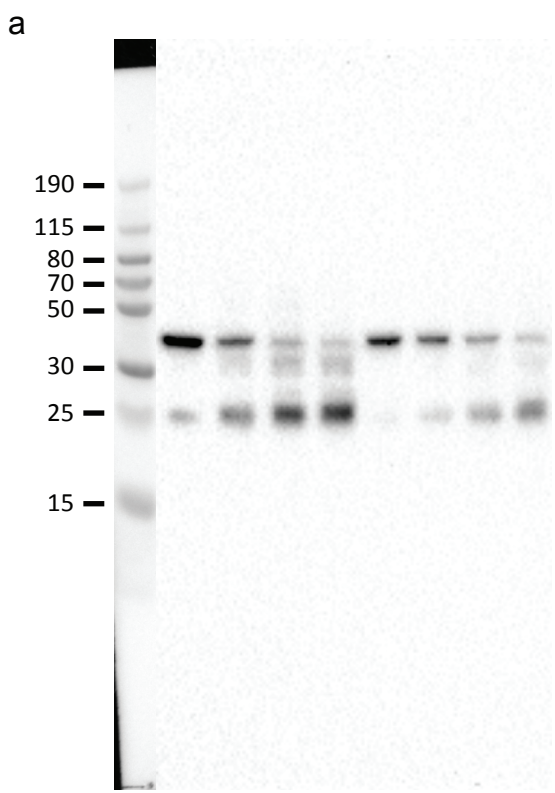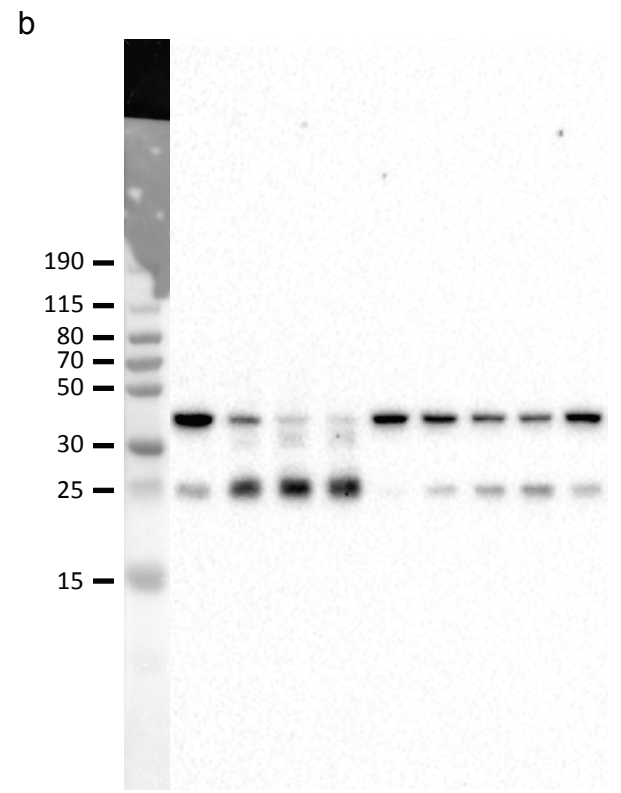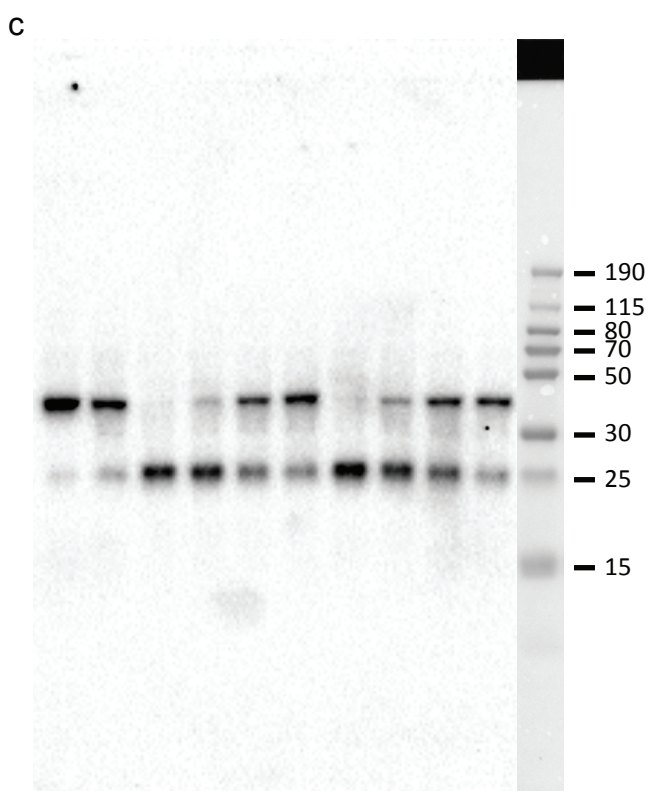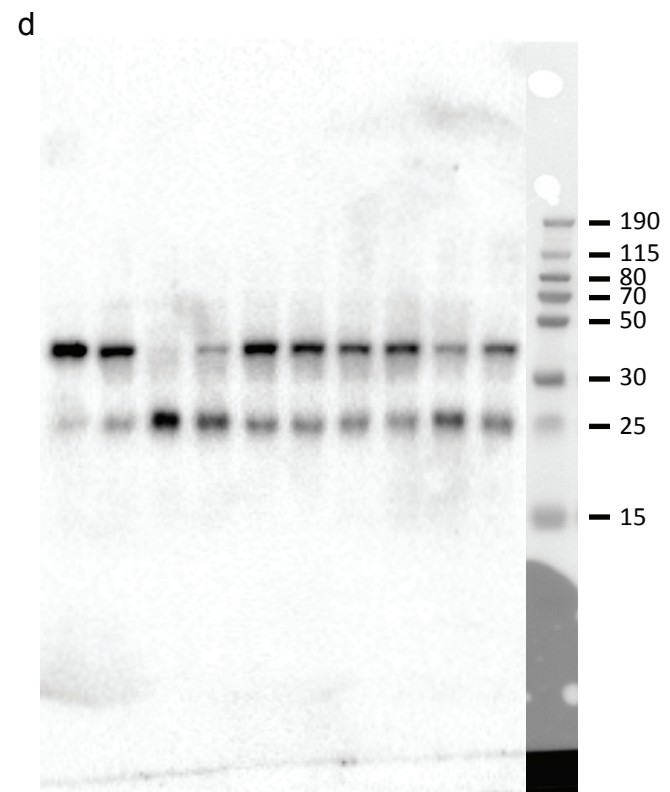

**Supplementary Figure 7.**

(a) Uncropped blot from figure 4a.

(b) Uncropped blot from figure 4b.

(c) Uncropped blot from figure 4c.

(d) Uncropped blot from figure 4d.

## Supplementary References

1. Holm L, Rosenstrom P. Dali server: conservation mapping in 3D. *Nucleic Acids Res* **38**, W545-549 (2010).



Supplementary Table 1

| <b>JR Library Name</b> | <b>Genotype (BY4741, a haploid strains)</b>                   |
|------------------------|---------------------------------------------------------------|
| JRY2884                | WT                                                            |
| JRY3377                | <i>vms1::NatMx</i>                                            |
| JRY3491                | <i>ski7::HygroMx</i>                                          |
| JRY3378                | <i>ski7::HygroMx vms1::NatMx</i>                              |
| JRY3380                | <i>rqc1::KanMx</i>                                            |
| JRY3383                | <i>rqc1::KanMx vms1::NatMx</i>                                |
| JRY3382                | <i>rqc1::KanMx ski7::HygroMx</i>                              |
| JRY3386                | <i>rqc1::KanMx vms1::NatMx ski7::HygroMx</i>                  |
| JRY3388                | <i>rqc2::KanMx</i>                                            |
| JRY3392                | <i>rqc2::KanMx vms1::NatMx</i>                                |
| JRY3390                | <i>rqc2::KanMx ski7::HygroMx</i>                              |
| JRY3394                | <i>rqc2::KanMx vms1::NatMx ski7::HygroMx</i>                  |
| JRY3401                | <i>ltn1::KanMx</i>                                            |
| JRY3405                | <i>ltn1::KanMx vms1::NatMx</i>                                |
| JRY3403                | <i>ltn1::KanMx ski7::HygroMx</i>                              |
| JRY3503                | <i>ltn1::KanMx vms1::NatMx ski7::HygroMx</i>                  |
| JRY3410                | <i>dom34::KanMx</i>                                           |
| JRY3415                | <i>dom34::KanMx vms1::NatMx</i>                               |
| JRY3412                | <i>dom34::KanMx ski7::HygroMx</i>                             |
| JRY3416                | <i>dom34::KanMx vms1::NatMx ski7::HygroMx</i>                 |
| JRY1734                | <i>pep4Δ::HIS3 prb1Δ::LEU2 bar1Δ::HISG lys2::GAL1/10-GAL4</i> |

Supplementary Table 2

| Vector backbone | Construct                      | JR library name |
|-----------------|--------------------------------|-----------------|
| pRS413          | EV-HIS3                        | 189             |
| pRS415          | EV-LEU2                        | 191             |
| pRS416          | EV-URA3                        | 192             |
| pRS416          | GFP                            | 1415a           |
| pRS415, 416     | pVMS1-VMS1-V5                  | 13862, 13863    |
| pRS415, 416     | pVMS1-VMS1-GFP                 | 3462D, 10703B   |
| pRS416          | pVMS1-VMS1-VIMΔ-GFP            | 10720B          |
| pRS416          | pVMS1-VMS1-VIMΔ-V5             | 13864           |
| pRS416          | pVMS1-VMS1-H279A-V5            | 13868           |
| pRS416          | pVMS1-VMS1-H283A-V5            | 13869           |
| pRS416          | pVMS1-VMS1-R284A-V5            | 13870           |
| pRS416          | pVMS1-VMS1-Y285A-V5            | 13871           |
| pRS416          | pVMS1-VMS1-T286A-V5            | 13872           |
| pRS416          | pVMS1-VMS1-R288A-GFP           | 13873           |
| pRS416          | pVMS1-VMS1-K290A-GFP           | 13874           |
| pRS416          | pVMS1-VMS1-Q291L-GFP           | 13875           |
| pRS416          | pVMS1-VMS1-G292A-GFP           | 13876           |
| pRS416          | pVMS1-VMS1-G293A-GFP           | 13877           |
| pRS416          | pVMS1-VMS1-G292/93A-GFP        | 13878           |
| pRS416          | pVMS1-VMS1-ΔS294-GFP           | 13879           |
| pRS416          | pVMS1-VMS1-Q295L-GFP           | 13880           |
| pRS416          | pVMS1-VMS1-D299A-GFP           | 13881           |
| pRS416          | pVMS1-VMS1-R288A-V5            | 13865           |
| pRS416          | pVMS1-VMS1-G292/293A-V5        | 13866           |
| pRS416          | pVMS1-VMS1-Q295L-V5            | 13867           |
| pRS415          | pTP1-mtRFP                     | 3862A           |
| pRS416          | pRQC1-RQC1                     | 13852           |
| pRS416          | pRQC1-RQC1-2HA                 | 13853           |
| pRS415          | pRQC2-RQC2                     | 13854           |
| pRS415          | pRQC2-RQC2-2HA                 | 13855           |
| pRS415          | pRQC2-RQC2-D98Y                | 13856           |
| pRS416          | pLTN1-LTN1                     | 13857           |
| pRS416          | pLTN1-LTN1-2HA                 | 13858           |
| pRS416          | pLTN1-LTN1-W1542E              | 13859           |
| pRS416          | pGPD-3XFLAG-6XHIS-GFP-RZ       | 13860           |
| pRS413          | pFUM1-FUM1-3XFLAG-6XHIS-GFP-RZ | 13861           |
| pRS416          | PGAL1-12HIS-VMS1               | 10755F          |
| pRS416          | PGAL1-12HIS-VMS1-R288A         | 13882           |

Supplementary Table 2

|        |                                         |        |
|--------|-----------------------------------------|--------|
| pRS416 | PGAL1-12HIS-VMS1-G292A                  | 13883  |
| pRS416 | PGAL1-12HIS-VMS1-G292/293A              | 13884  |
| pRS416 | PGAL1-12HIS-VMS1- $\Delta$ S294         | 13885  |
| pRS416 | PGAL1-12HIS-VMS1-Q295L                  | 13886  |
| pRS416 | PGAL1-12HIS-VMS1(1-417)                 | 10755B |
| pRS416 | PGAL1-12HIS-VMS1(1-417, R288A)          | 13887  |
| pRS416 | PGAL1-12HIS-VMS1-(1-417, G292A)         | 13888  |
| pRS416 | PGAL1-12HIS-VMS1-(1-417, G292/293A)     | 13889  |
| pRS416 | PGAL1-12HIS-VMS1-(1-417, $\Delta$ S294) | 13890  |
| pRS416 | PGAL1-12HIS-VMS1-(1-417, Q295L)         | 13891  |
